# Supplementary material for: Highly dispersed Cu2O quantum dots (about 2 nm) constructed by a simple functional group anchoring strategy boost the photocatalytic water splitting ability by 72 times
Source: Royal Society of Chemistry journal article supplement (doi:10.1039/d2ta07596b), 2022-12-07
Supplement: d2ta07596b1.pdf [file d2ta07596b1.pdf]

**Supporting information for**

**Highly dispersed Cu<sub>2</sub>O quantum dot (about 2 nm) constructed by  
simple functional group anchoring strategy: Boosts 72 times  
photocatalytic water splitting ability**

Jindou Hu<sup>1</sup>, Xiangjun Shen<sup>1</sup>, Anjie Liu, Zhenjiang Lu, Jing Xie, Aize Hao, Xinhui Jiang,

Jiangfeng Wang, Yali Cao\*

State Key Laboratory of Chemistry and Utilization of Carbon Based Energy  
Resources; College of Chemistry, Xinjiang University, Urumqi, 830017, Xinjiang, PR  
China.

\*Corresponding author. Tel: +86-991-8583083; Fax: +86-991-8588883.

E-mail: [caoyali523@163.com](mailto:caoyali523@163.com), [hujindou@xju.edu.cn](mailto:hujindou@xju.edu.cn)

**Characterization**

The morphology, sizes of the obtained photocatalysts and the energy dispersive spectrometry (EDS) data were measured using a Hitachi S-4800 scanning electron microscopy (SEM) at 5 kV. The high-resolution transmission electron microscopy (HRTEM) images and elemental mapping images of the as-synthesized materials were recorded on a JEOL JEM-2010F transmission electron microscope at 200 kV. X-ray diffraction (XRD) was performed on a Bruker D8 X-ray diffractometer with a Cu-K $\alpha$  radiation in the 2 $\theta$  range of 10-80°. Fourier transform infrared spectra (FT-IR) were recorded on a Bruker VERTEX 70 IR spectrometer using KBr pellets. The X-ray photoelectron spectroscopy (XPS) was measured on a Thermo Fisher Scientific

ESCALAB 250Xi photoelectron spectrometer. Ultraviolet-visible (UV-vis) absorption spectra of the as-obtained photocatalysts were measured using a Hitachi U-3010 spectrophotometer during 250-800 nm at room temperature. An electron spin resonance spectrometer (Evisa JES-FA300) was used to obtain the electron paramagnetic resonance (EPR) spectroscopy. CHI 760E electrochemical instrument was used to perform the Mott-Schottky curves with a three-electrode quartz cells (Counter electrode: Pt wire; Reference electrode: Ag/AgCl; Working electrode: photocatalysts coated ITO glass). The 300 W Xe lamp of Beijing China Education Aulight Co., Ltd. was used as the light source. A Vis REF standard visibility mirror was used with a light source wavelength of 350-780 nm. The photoluminescence spectra (PL) were obtained on a Hitachi F-4500 fluorescence spectrophotometer (excitation wavelength: 250 nm). Gas chromatograph (GC 7920, conductivity detector (TCD), N<sub>2</sub> carrier gas).

### **Photocatalytic hydrogen evolution measurement**

Photocatalytic hydrogen evolution (PHE) experiments were carried out on an online photocatalytic hydrogen evolution system (CEL-SPH2NP, Beijing China Education Aulight Co., Ltd.). The quartz reaction kettle is used as a container, and the closed gas circulation system and gas extraction system are connected at the interface by coating vacuum grease. 0.1 g of photocatalyst was dispersed in 100 mL of aqueous solution containing 25 mL of methanol and dispersed uniformly under sonication. methanol was chosen as the cavity sacrificial agent and a 300W Xe lamp was used as the light source. Before the reaction, the reactor is degassed several times to remove air from the reactor. Volatile hydrogen was determined by online gas chromatography (GC 7920, conductance detector (TCD), N<sub>2</sub> carrier gas), and the precipitated gas was analyzed and detected every 1 h.

## Photocatalytic stability test

Three times (15h) photocatalytic hydrogen evolution experiments were carried out on the photocatalytic hydrogen evolution system, including a 5-hour cycle. After the end of one cycle, the reactor was taken down and stood for a period of time, and then vacuumized again to continue the next cycle hydrogen production experiment.

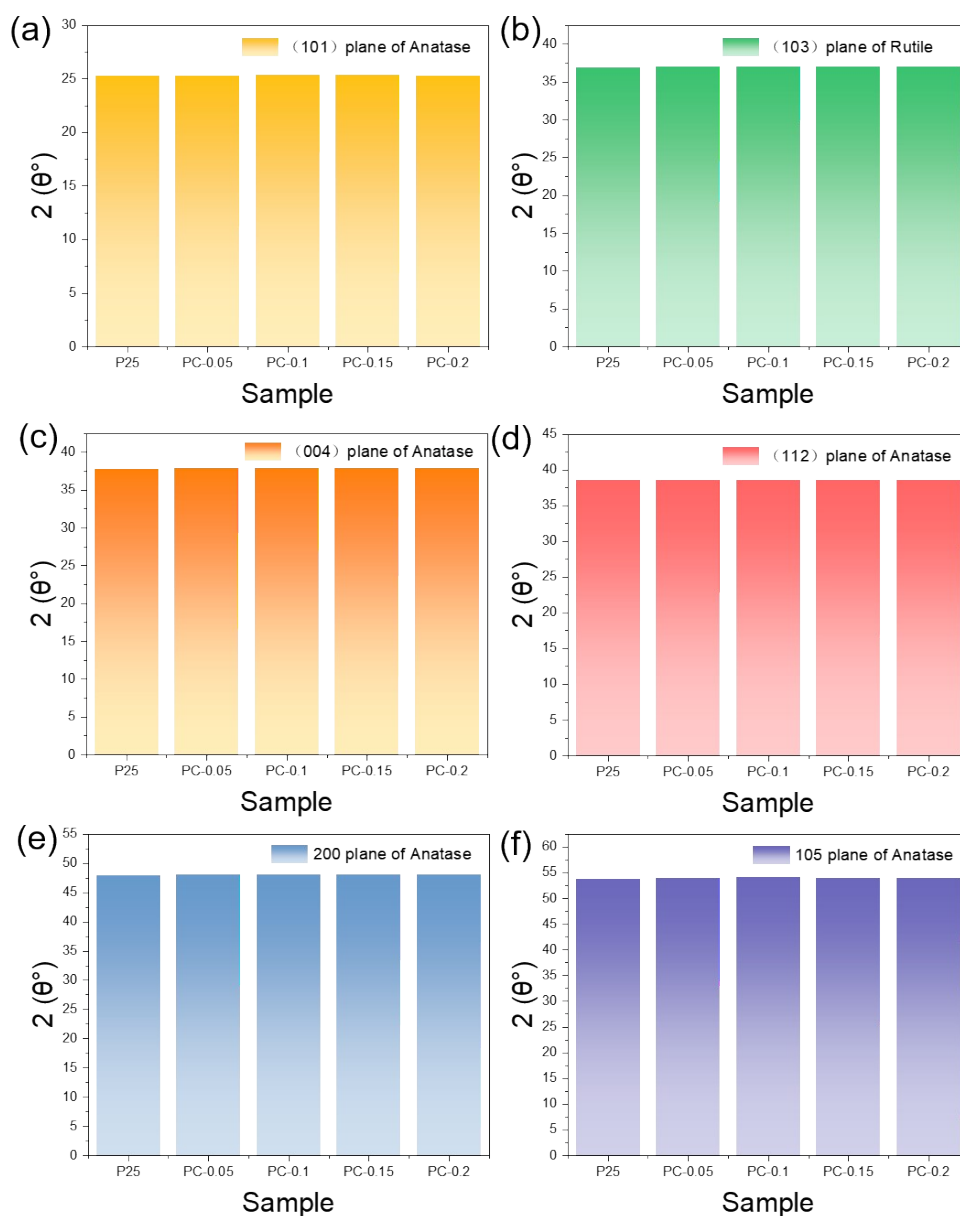

Fig. S1. The peak position of each sample in XRD: a. (101) plane of anatase; b. (103) plane of Rutile; c. (112) plane of anatase; d. (004) plane of anatase

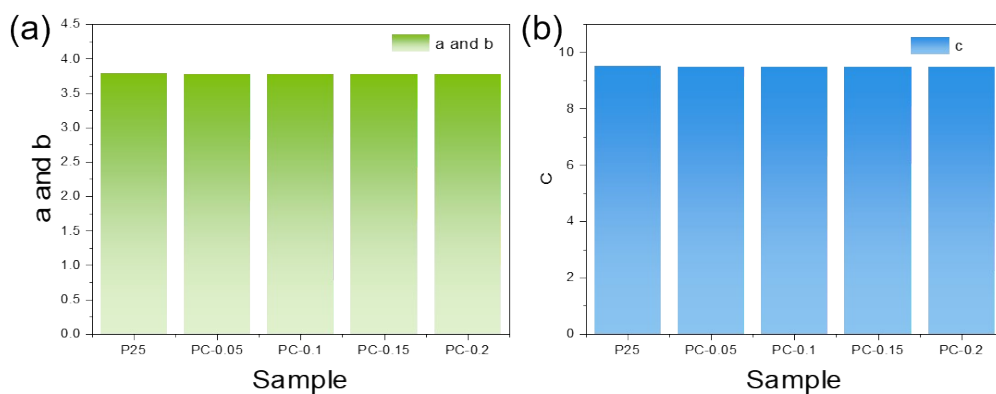

Fig. S2. The calculated lattice constant of each sample from XRD.

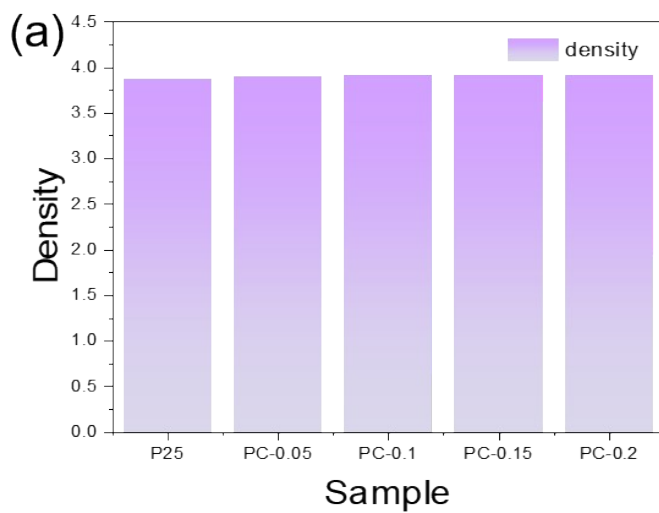

Fig. S3. The calculated lattice density of each sample from XRD.

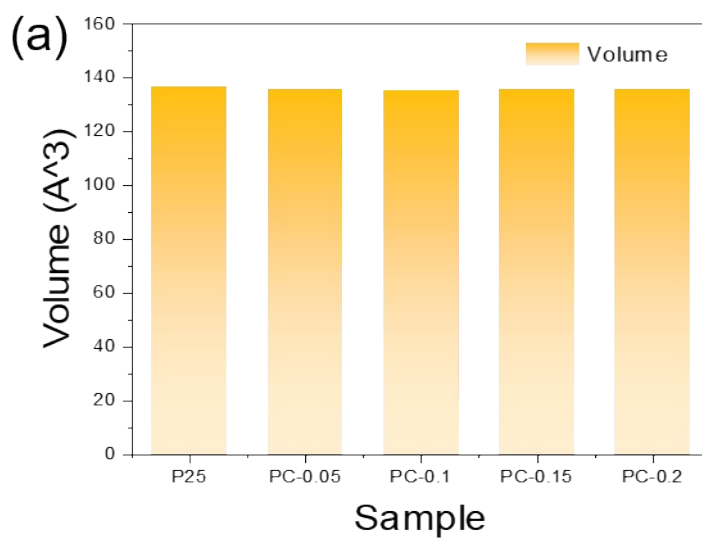

Fig. S4. The calculated lattice volume of each sample from XRD.

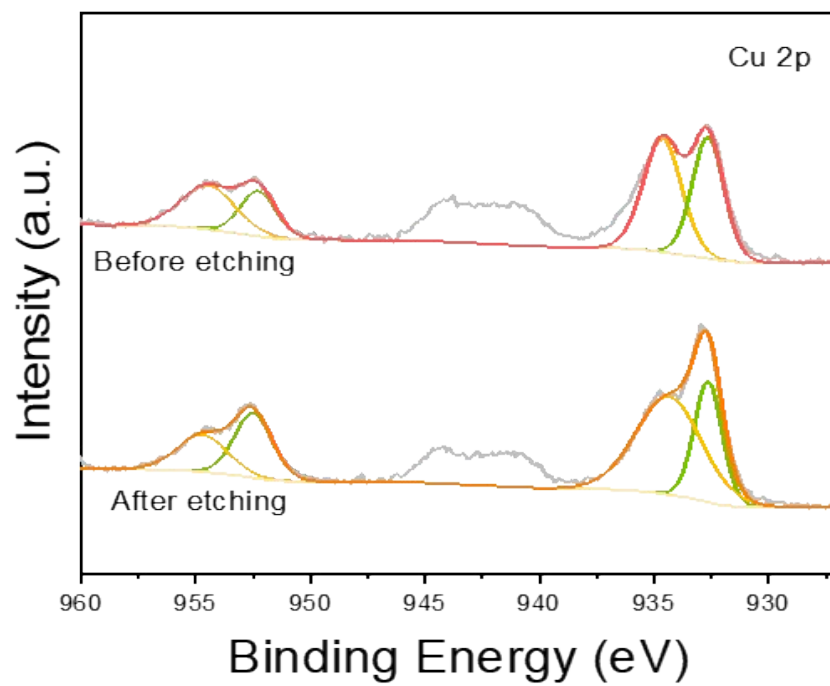

Fig. S5. Comparison of high-resolution XPS spectra of Cu before and after etching.

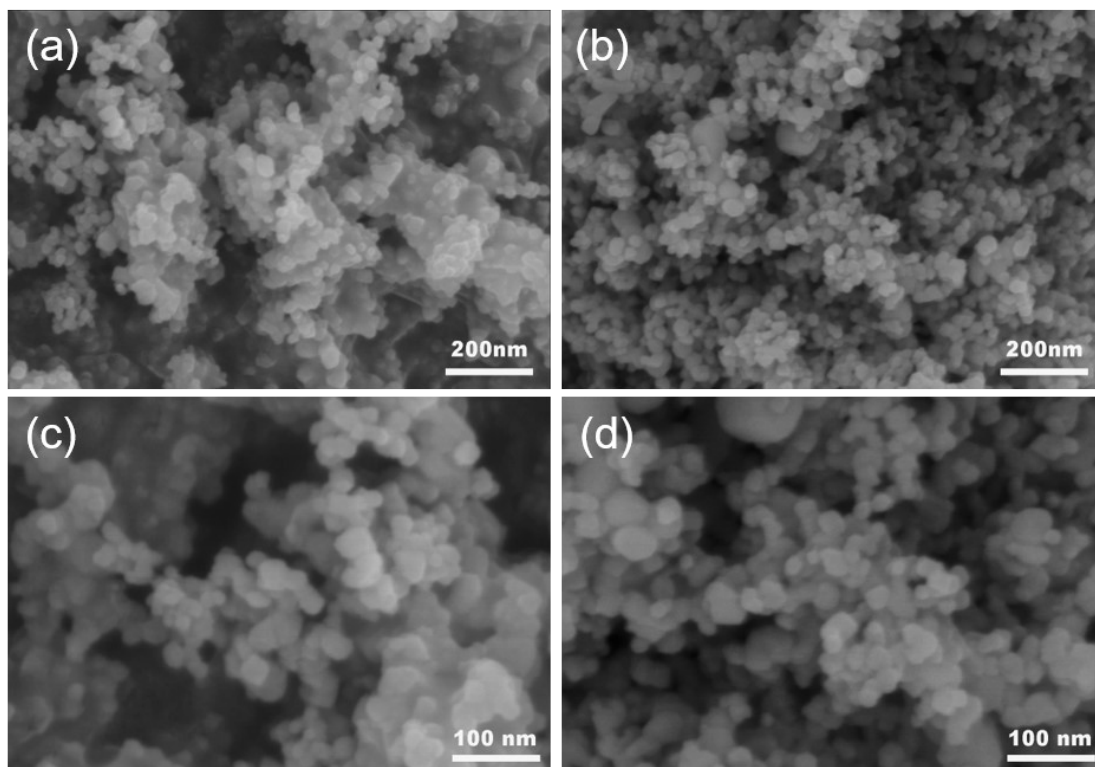

Fig. S6. SEM images of P25 10w (a),20w (c) and PC-0.1 10w (b),20w (d)

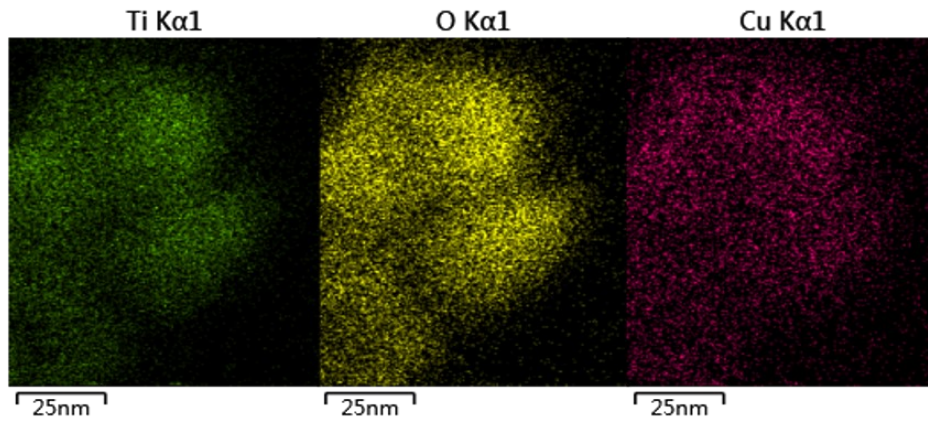

Fig. S7. Elemental mapping of PC-0.1 for Ti, O, Cu.

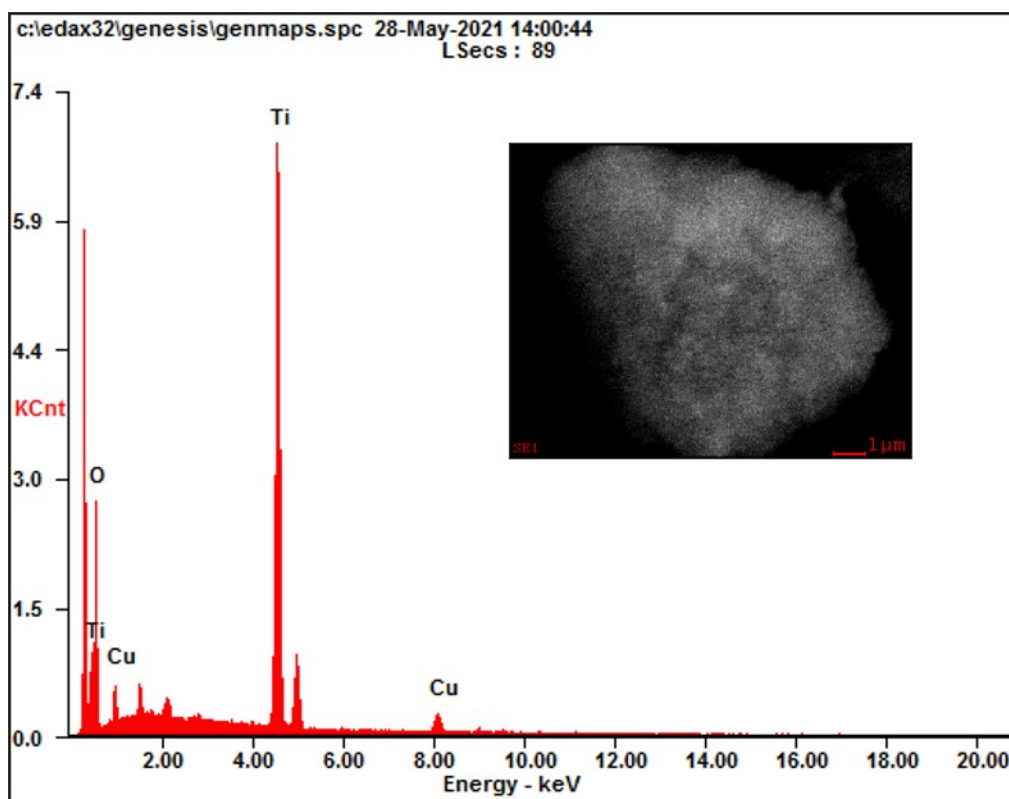

Fig. S8. Element contents of PC-0.1

Table S1. Element contents of PC-0.1

| Element | Wt%        | At%   |
|---------|------------|-------|
| OK      | 44.41      | 71.08 |
| TiK     | 49.53      | 26.48 |
| CuK     | 06.06      | 02.44 |
| Matrix  | Correction | ZAF   |

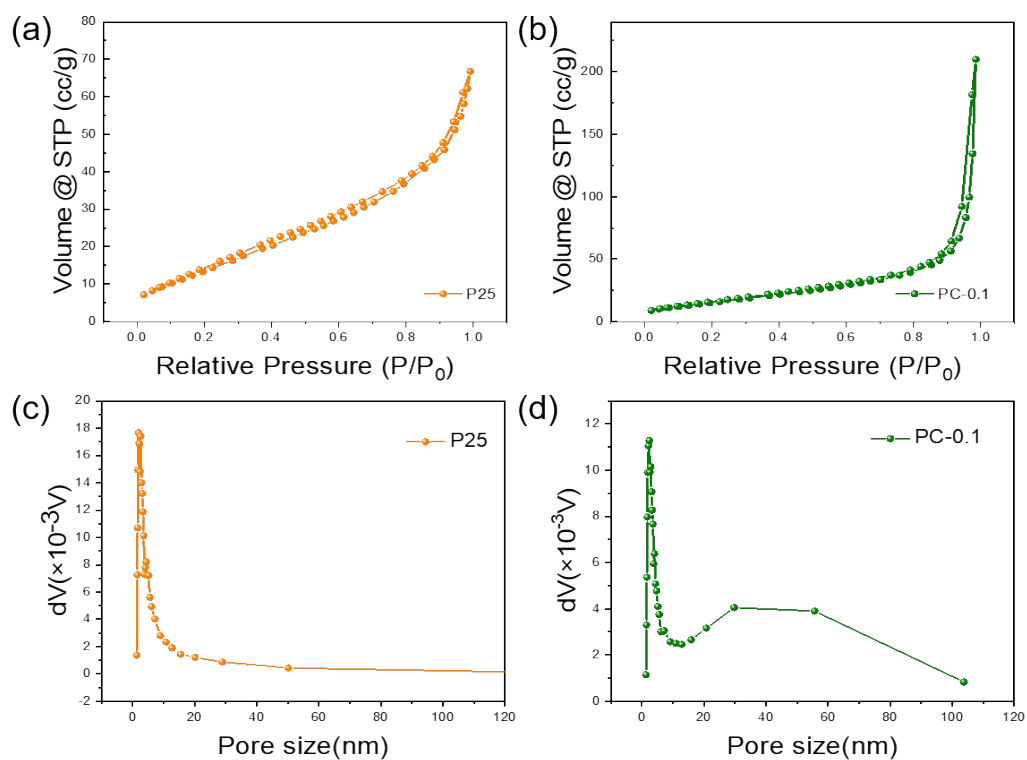

Fig. S9. pore size distributions of P25 (a) and PC-0.1 (b), N<sub>2</sub> adsorption–desorption isotherms of P25 (c) and PC-0.1 (d).

Table S2. The surface area, pore volume and pore diameter of P25 and P-ANL-3

| Sample | Surface Area (m <sup>2</sup> /g) | Pore Volume (cc/g) | Pore Diameter (nm) |
|--------|----------------------------------|--------------------|--------------------|
| P25    | 82.395                           | 0.114              | 1.194              |
| PC-0.1 | 70.140                           | 0.330              | 2.574              |

Table S3. Comparisons of the photocatalytic H<sub>2</sub> evolution of the catalysts prepared in the present work with the recently reported TiO<sub>2</sub>-based catalysts.

| Photocatalyst          | Light Source                              | H <sub>2</sub> evolution rate/( $\mu\text{mol}\cdot\text{g}^{-1}\cdot\text{h}^{-1}$ ) | Reference |
|------------------------|-------------------------------------------|---------------------------------------------------------------------------------------|-----------|
| This Work              | 300 W Xe lamp                             | 14911                                                                                 | -         |
| TiO <sub>2</sub> /rGO  | 3 W-LED (365 nm, 80 mW cm <sup>-2</sup> ) | 103.82                                                                                | [1]       |
| Cu-TiO <sub>2</sub>    | UV (450 W Hg)                             | 8470                                                                                  | [2]       |
| Ni/TiO <sub>2</sub>    | UV (450 W Hg)                             | 3390                                                                                  | [3]       |
| Pt/TiO <sub>2</sub>    | AM 1.5 G solar simulator                  | 11200                                                                                 | [4]       |
| Cu/TiO <sub>2</sub>    | UV (450 W Hg)                             | 8470                                                                                  | [3]       |
| Cu/S-TiO <sub>2</sub>  | 500 W Xe lamp with UV cut off filter      | 7500                                                                                  | [5]       |
| Pt/Ga-TiO <sub>2</sub> | 150 W Xe lamp                             | 5722                                                                                  | [6]       |
| Rh/Nb-TiO <sub>2</sub> | 300 W Xe lamp                             | 7850                                                                                  | [7]       |
| TiO <sub>2</sub> -His  | Xe lamp                                   | 216.3                                                                                 | [8]       |

## References

- [1] Cao Y, Wang P, Fan J, Yu H, Covalently functionalized graphene by thiourea for enhancing H<sub>2</sub>-evolution performance of TiO<sub>2</sub> photocatalyst, *Ceram. Int.* 47 (2021) 654-661.
- [2] Kumaravel V, Mathew S, Bartlett J, Pillai S C, Photocatalytic hydrogen production using metal doped TiO<sub>2</sub>: A review of recent advances, *Appl.Catal.B Environ.* 244 (2019) 1021-1064.
- [3] Montoya A T, Gillan E G, Enhanced photocatalytic hydrogen evolution from transition-metal surface-modified TiO<sub>2</sub>, *ACS Omega.* 3 (2018) 2947-2955.
- [4] Banerjee B, Amoli V, Maurya A, Sinha A K, Bhaumik A, Green synthesis of Pt-doped TiO<sub>2</sub> nanocrystals with exposed (001) facets and mesoscopic void space for photo-splitting of water under solar irradiation, *Nanoscale.* 7 (2015) 10504-10512.
- [5] Zhang W, Wang S, Li J, Yang X, Photocatalytic hydrogen production from methanol aqueous solution under visible-light using Cu/S-TiO<sub>2</sub> prepared by



- electroless plating method, *Catal. Commun.* 59 (2015) 189-194.
- [6] Luo S, Nguyen-Phan T D, Vovchok D, Waluyo I, Palomino R M, Gamalski A D, Barrio L, Xu W, Polyansky D E, Rodriguez J A, Senanayake S D, Enhanced, robust light-driven H<sub>2</sub> generation by gallium-doped titania nanoparticles, *Phys. Chem. Chem. Phys.* 20 (2018) 2104-2112.
- [7] Huang J, Li G, Zhou Z, Jiang Y, Hu Q, Xue C, Guo W, Efficient photocatalytic hydrogen production over Rh and Nb codoped TiO<sub>2</sub> nanorods, *Chem. Eng. J.* 337 (2018) 282-289.
- [8] Han X, Ma H, Wang C, Li Y, Enhanced photocatalytic hydrogen production by loading histidine on TiO<sub>2</sub>, *J. Phys. Energy* 3(2020) 014001-014010.
